# Supplementary material for: Microwave-assisted copper-catalyzed hydroxylation of aryl halides in water
Source: Royal Society of Chemistry journal article supplement (doi:10.1039/c3ra44613a), 2013-01-01

# Microwave-assisted copper-catalyzed hydroxylation of aryl halides in water

Fang Ke,<sup>a</sup> Xiaole Chen,<sup>a</sup> Zhengkai Li,<sup>b</sup> Haifeng Xiang<sup>b</sup> and Xiangge Zhou<sup>b</sup> \*

<sup>a</sup> College of Pharmacy, Fujian Medical University, Fuzhou 350004, China.

<sup>b</sup> Institute of Homogeneous Catalysis, College of Chemistry, Sichuan University, Chengdu 610041, China

E-mail: zhouxiangge@scu.edu.cn

Fax: +86-28-85412026

## Supplementary Information

### Table of Contents

|                                                                        |    |
|------------------------------------------------------------------------|----|
| 1. General information                                                 | S2 |
| 2. General procedure for the catalytic reactions                       | S3 |
| 3. Experimental procedures and characterization data                   | S3 |
| 4. References                                                          | S8 |
| 5. <sup>1</sup> H NMR and <sup>13</sup> C NMR spectra for the products | S8 |

## 1. General information

All reagents were purchased from commercial suppliers and used without further purification. A CEM Discover microwave synthesizer was used in the standard configuration as delivered, including proprietary software. All experiments were carried out in sealed microwave process vials (10 mL). The temperature of the reaction mixture inside the vessel was monitored using a calibrated infrared temperature control under the reaction vessel. After completion of the reaction, the vial was cooled down to 25 °C via air jet cooling before opening. Column chromatography was carried out with silica gel (200-300 mesh). Thin layer chromatography was carried out using Merck silica gel GF254 plates. All products were characterized by NMR. <sup>1</sup>H NMR spectra were recorded at 400 MHz and <sup>13</sup>C NMR spectra were recorded at 100 MHz (Bruker DPX) with CDCl<sub>3</sub>, DMSO-*d*<sub>6</sub> and D<sub>2</sub>O as solvent. Chemical shifts are reported in ppm using TMS as internal standard. Gas chromatography - mass spectra (GC/MS) were recorded on an Agilent Technologies 6890 N instrument with an Agilent 5973N mass detector (EI) and a HP5-MS 30 m x 0.25 mm capillary apolar column (Stationary phase: 5% diphenyldimethylpolysiloxane film, 0.25 μm). GC/MS method: Initial temperature: 150 °C; Initial time: 1 min; Ramp: about 15°C/min until 250 °C then 20 min.

## 2. General procedure for the catalytic reactions

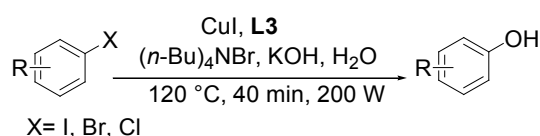

In a 10 mL glass tube aryl halide (1.0 mmol), CuCl<sub>2</sub> (0.1 mmol), L3 (0.1 mmol), (*n*-Bu)<sub>4</sub>NBr (0.1 mmol) and KOH (2.0 equiv) and 3.0 mL water were placed. The vessel was then sealed with a septum and placed into the microwave cavity. Initial microwave irradiation of 200 W by using a CEM Discover microwave synthesiser was used and the temperature being ramped from rt to the desired temperature of 120 °C. Once this was reached, the reaction mixture was held at this temperature for 40 min. The reaction mixture was stirred continuously during the reaction. After allowing the mixture to cool to rt, the reaction vessel was opened and the contents were acidified with 2 M hydrochloric acid to pH 5–7. The aqueous layer was extracted with ethyl acetate (3X15 mL). The organic washings were combined, dried over MgSO<sub>4</sub>, and then ethyl acetate was removed in vacuo. The residue was purified by silica-gel column chromatography to afford the corresponding product. All the products were confirmed by NMR and MS spectroscopic analysis.

## MTT ASSAY MEHTODS

Yellow-coloured MTT (3-(4,5-dimethylthiazol-2-yl)-2,5-diphenyltetrazolium bromide) is reduced by the mitochondria of living cells to form a purple-coloured (formazan) crystalline derivative. These crystals can be solubilised by the addition of dimethyl sulphoxide (DMSO) and their concentration determined spectrophotometrically, as detailed below.

The human erythroleukemic cell line, K562, and the human nasopharyngeal carcinoma cell line, CNE2, were employed to determine the anticancer ability of synthesized chemicals. Each cell line was seeded in 96-well plates at a density of 9000 cells per well in RPMI 1640 medium for 24 h. The next day, 2,3-dihydroxy-1,4-naphthoquinone solutions, ranging in concentrations from 10<sup>-10</sup> to 10<sup>-4</sup> M were added to the culture medium. MTT reagent (5 mg/ml) was added to each sample after 48 hrs of treatment. The cells were incubated for 4 h and the absorbance of samples (A<sub>550</sub>) was determined using a plate reader. Experiments were repeated 6 times in 8 replicates.

### 3. Experimental procedures and characterization data

#### Phenol<sup>1</sup>

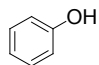

Purification by flash chromatography (petroleum ether/ethyl acetate 4:1). White solid.

<sup>1</sup>H NMR (400 MHz, CDCl<sub>3</sub>) δ = 7.29-7.32 (m, 2H), 6.99-7.02 (m, 1H), 6.91 (d, *J* = 8 Hz, 2H), 5.73 (s, 1H).

<sup>13</sup>C NMR (100 MHz, CDCl<sub>3</sub>) δ = 155.3, 129.8, 121.0, 115.5.

MS (EI, *m/z*): 94 [M<sup>+</sup>].

#### *p*-Cresol<sup>1</sup>

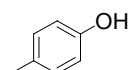

Purification by flash chromatography (petroleum ether/ethyl acetate 4:1). White solid.

<sup>1</sup>H NMR (400 MHz, CDCl<sub>3</sub>) δ = 7.09 (d, *J* = 6 Hz, 2H), 6.79 (d, *J* = 8.4 Hz, 2H), 5.64 (s, 1H), 2.33 (s, 3H).

<sup>13</sup>C NMR (100 MHz, CDCl<sub>3</sub>) δ = 153.1, 130.2, 115.3, 115.2, 20.5.

MS (EI, *m/z*): 108 [M<sup>+</sup>].

#### 4-Methoxyphenol<sup>1</sup>

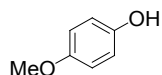

Purification by flash chromatography (petroleum ether/ethyl acetate 4:1). White solid.

<sup>1</sup>H NMR (400 MHz, CDCl<sub>3</sub>) δ = 6.81 (d, *J* = 3.2 Hz, 4H), 5.09 (s, 1H), 3.80 (s, 3H).

<sup>13</sup>C NMR (100 MHz, CDCl<sub>3</sub>) δ = 153.6, 149.5, 116.2, 115.0, 55.9.

MS (EI, *m/z*): 124 [M<sup>+</sup>].

#### 4-Nitrophenol<sup>1</sup>

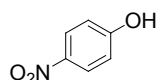

Purification by flash chromatography (petroleum ether/ethyl acetate 4:1). Yellow solid.

<sup>1</sup>H NMR (400 MHz, CDCl<sub>3</sub>) δ = 8.20 (d, *J* = 9.2 Hz, 2H), 6.96 (d, *J* = 9.2 Hz, 2H), 6.49 (s, 1H).

<sup>13</sup>C NMR (100 MHz, CDCl<sub>3</sub>) δ = 161.6, 139.9, 126.3, 115.8.

MS (EI, *m/z*): 139 [M<sup>+</sup>].

#### Hydroquinone<sup>2</sup>

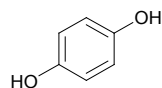

Purification by flash chromatography (petroleum ether/ethyl acetate 4:1). White solid.

<sup>1</sup>H NMR (400 MHz, DMSO-*d*<sub>6</sub>) δ = 8.62 (s, 2H), 6.59 (s, 4H).

<sup>13</sup>C NMR (100 MHz, DMSO-*d*<sub>6</sub>) δ = 150.2, 116.1.

MS (EI, *m/z*): 110 [M<sup>+</sup>].

#### 4-Hydroxyacetophenone<sup>1</sup>

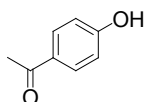

Purification by flash chromatography (petroleum ether/ethyl acetate 5:1). White solid.

<sup>1</sup>H NMR (400 MHz, DMSO-*d*<sub>6</sub>) δ = 10.32 (s, 1H), 7.83-7.84 (m, 2H), 6.85 (d, *J* = 7.2 Hz, 2H), 2.45 (s, 3H).

<sup>13</sup>C NMR (100 MHz, DMSO-*d*<sub>6</sub>) δ = 196.4, 162.5, 131.2, 129.1, 115.6, 26.7.

MS (EI, *m/z*): 136 [*M*<sup>+</sup>].

#### 4-Hydroxybenzoic acid<sup>1</sup>

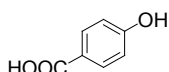

Purification by flash chromatography (petroleum ether/ethyl acetate 3:1). White solid.

<sup>1</sup>H NMR (400 MHz, DMSO-*d*<sub>6</sub>) δ = 12.42 (br, 1H), 10.21 (s, 1H), 7.81 (d, *J* = 9.2 Hz, 2H), 6.83 (d, *J* = 8.8 Hz, 2H).

<sup>13</sup>C NMR (100 MHz, DMSO-*d*<sub>6</sub>) δ = 167.6, 162.1, 132.0, 121.9, 115.6.

MS (EI, *m/z*): 138 [*M*<sup>+</sup>].

#### 4-Hydroxybenzaldehyde<sup>1</sup>

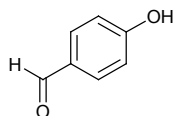

Purification by flash chromatography (petroleum ether/ethyl acetate 5:1). White yellow solid.

<sup>1</sup>H NMR (400 MHz, DMSO-*d*<sub>6</sub>) δ = 10.59 (s, 1H), 9.79 (s, 1H), 7.76 (d, *J* = 8.8 Hz, 2H), 6.94 (d, *J* = 8.8 Hz, 2H).

<sup>13</sup>C NMR (100 MHz, DMSO-*d*<sub>6</sub>) δ = 191.4, 163.7, 132.6, 128.9, 116.3.

MS (EI, *M/Z*): 122 [*M*<sup>+</sup>].

#### 4-Hydroxybenzotrile<sup>3</sup>

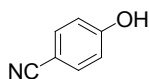

Purification by flash chromatography (petroleum ether/ethyl acetate 4:1). White solid.

<sup>1</sup>H NMR (400 MHz, CDCl<sub>3</sub>) δ = 7.58 (d, *J* = 8.8 Hz, 2H), 6.97 (d, *J* = 8.8 Hz, 2H).

<sup>13</sup>C NMR (100 MHz, CDCl<sub>3</sub>) δ = 160.4, 134.4, 119.3, 116.5, 102.8.

MS (EI, *m/z*): 119 [*M*<sup>+</sup>].

#### 4-Fluorophenol<sup>4</sup>

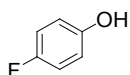

Purification by flash chromatography (petroleum ether/ethyl acetate 6:1). White solid.

<sup>1</sup>H NMR (400 MHz, CDCl<sub>3</sub>) δ = 6.93-6.98 (m, 2H), 6.80-6.84 (m, 2H), 6.20 (s, 1H).

<sup>13</sup>C NMR (100 MHz, CDCl<sub>3</sub>) δ = 158.7, 156.3, 151.1, 116.5, 116.4, 116.3, 116.0.

MS (EI, *m/z*): 112 [*M*<sup>+</sup>].

#### 4-Chlorophenol<sup>1</sup>

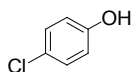

Purification by flash chromatography (petroleum ether/ethyl acetate 6:1). White solid.

<sup>1</sup>H NMR (400 MHz, CDCl<sub>3</sub>) δ = 7.22 (d, *J* = 8.8 Hz, 2H), 6.79 (d, *J* = 8.8 Hz, 2H), 5.32 (s, 1H).

<sup>13</sup>C NMR (100 MHz, CDCl<sub>3</sub>) δ = 154.0, 129.6, 125.8, 116.7.

MS (EI, *m/z*): 128 [M<sup>+</sup>].

#### 4-Bromophenol<sup>1</sup>

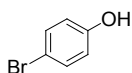

Purification by flash chromatography (petroleum ether/ethyl acetate 6:1). White solid.

<sup>1</sup>H NMR (400 MHz, CDCl<sub>3</sub>) δ = 7.36 (d, *J* = 9.2 Hz, 2H), 6.75 (d, *J* = 8.8 Hz, 2H), 5.12 (s, 1H).

<sup>13</sup>C NMR (100 MHz, CDCl<sub>3</sub>) δ = 154.5, 132.5, 117.2, 113.0.

MS (EI, *m/z*): 173 [M<sup>+</sup>].

#### *o*-Cresol<sup>4</sup>

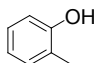

Purification by flash chromatography (petroleum ether/ethyl acetate 5:1). White solid.

<sup>1</sup>H NMR (400 MHz, CDCl<sub>3</sub>) δ = 7.12-7.19 (m, 2H), 6.90-6.92 (m, 1H), 6.80-6.83 (m, 1H), 4.92-4.93 (m, 1H), 2.31 (s, 3H).

<sup>13</sup>C NMR (100 MHz, CDCl<sub>3</sub>) δ = 153.7, 131.2, 127.2, 123.9, 120.9, 115.1, 15.8.

MS (EI, *m/z*): 108 [M<sup>+</sup>].

#### *o*-Nitrophenol<sup>5</sup>

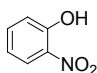

Purification by flash chromatography (petroleum ether/ethyl acetate 4:1). Yellow solid.

<sup>1</sup>H NMR (400 MHz, CDCl<sub>3</sub>) δ = 10.60 (s, 1H), 8.12-8.14 (m, 1H), 7.60-7.61 (m, 1H), 7.02-7.19 (m, 1H), 7.01 (s, 1H).

<sup>13</sup>C NMR (100 MHz, CDCl<sub>3</sub>) δ = 155.1, 137.5, 130.3, 125.1, 120.2, 120.0.

MS (EI, *m/z*): 139 [M<sup>+</sup>].

#### Catechol<sup>1</sup>

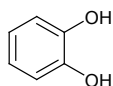

Purification by flash chromatography (petroleum ether/ethyl acetate 4:1). white solid.

<sup>1</sup>H NMR (400 MHz, CDCl<sub>3</sub>) δ = 6.89-6.92 (m, 2H), 6.83-6.86 (m, 2H), 5.34 (s, 2H).

<sup>13</sup>C NMR (100 MHz, CDCl<sub>3</sub>) δ = 143.5, 121.3, 115.5.

MS (EI, *M/Z*): 110 [M<sup>+</sup>].

### 2-Hydroxybenzoic acid

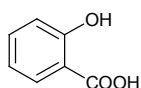

Purification by flash chromatography (petroleum ether/ethyl acetate 4:1). White solid.

**<sup>1</sup>H NMR (400 MHz, DMSO-*d*<sub>6</sub>)**  $\delta$  = 13.63 (br-s, 1H), 11.34 (br-s, 1H), 7.79-7.81 (m, 1H), 7.49-7.52 (m, 1H), 6.91-6.96 (m, 2H).

**<sup>13</sup>C NMR (100 MHz, DMSO-*d*<sub>6</sub>)**  $\delta$  = 172.3, 161.6, 136.1, 130.7, 119.6, 117.5, 113.4.

**MS (EI, m/z):** 138 [M<sup>+</sup>].

### 2-Chlorophenol<sup>1</sup>

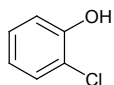

Purification by flash chromatography (petroleum ether/ethyl acetate 6:1). White solid.

**<sup>1</sup>H NMR (400 MHz, CDCl<sub>3</sub>)**  $\delta$  = 6.59-6.67 (m, 1H), 6.43-6.59 (m, 2H), 6.39-6.43 (m, 1H), 4.46 (s, 1H).

**<sup>13</sup>C NMR (100 MHz, CDCl<sub>3</sub>)**  $\delta$  = 144.5, 137.0, 120.0, 117.0, 114.9, 114.8.

**MS (EI, m/z):** 128 [M<sup>+</sup>].

### *m*-Methylphenol<sup>4</sup>

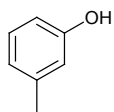

Purification by flash chromatography (petroleum ether/ethyl acetate 4:1). White solid.

**<sup>1</sup>H NMR (400 MHz, CDCl<sub>3</sub>)**  $\delta$  = 7.16-7.18 (m, 1H), 6.67-6.83 (m, 3H), 5.63 (s, 1H), 2.36 (s, 3H).

**<sup>13</sup>C NMR (100 MHz, CDCl<sub>3</sub>)**  $\delta$  = 155.3, 139.4, 129.5, 121.8, 116.2, 112.4, 21.4.

**MS (EI, m/z):** 108 [M<sup>+</sup>].

### *m*-Methoxyphenol<sup>4</sup>

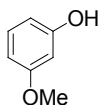

Purification by flash chromatography (petroleum ether/ethyl acetate 4:1). White oil.

**<sup>1</sup>H NMR (400 MHz, CDCl<sub>3</sub>)**  $\delta$  = 7.15-7.19 (m, 1H), 6.47-6.56 (m, 3H), 6.05 (s, 1H), 3.78 (s, 3H).

**<sup>13</sup>C NMR (100 MHz, CDCl<sub>3</sub>)**  $\delta$  = 160.8, 156.7, 130.3, 108.1, 106.6, 101.7, 55.4.

**MS (EI, m/z):** 124 [M<sup>+</sup>].

### 3,4-Dimethylphenol<sup>6</sup>

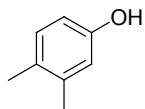

Purification by flash chromatography (petroleum ether/ethyl acetate 4:1). White solid.

**<sup>1</sup>H NMR (400 MHz, CDCl<sub>3</sub>)**  $\delta$  = 7.03 (d, *J* = 6.4 Hz, 1H), 6.34-6.71 (m, 2H), 5.40 (s, 1H), 2.25 (d, *J* = 6.8 Hz, 6H).

$^{13}\text{C}$  NMR (100 MHz,  $\text{CDCl}_3$ )  $\delta$  = 153.4, 138.0, 130.6, 128.8, 116.7, 112.5, 19.9, 18.8.

MS (EI, m/z): 122 [ $\text{M}^+$ ].

### 3, 5-Dihydroxytoluene<sup>7</sup>

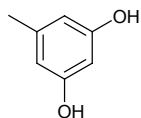

Purification by flash chromatography (petroleum ether/ethyl acetate 4:1). White solid.

$^1\text{H}$  NMR (400 MHz,  $\text{DMSO}-d_6$ )  $\delta$  = 9.04 (s, 2H), 6.02-6.03 (m, 1H), 8.50 (s, 2H), 2.12 (s, 3H).

$^{13}\text{C}$  NMR (100 MHz,  $\text{DMSO}-d_6$ )  $\delta$  = 158.7, 139.6, 107.5, 100.2, 21.7.

MS (EI, m/z): 124 [ $\text{M}^+$ ].

### 3-Hydroxypyridine<sup>8</sup>

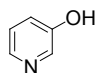

Purification by flash chromatography (petroleum ether/ethyl acetate 4:1). White oil.

$^1\text{H}$  NMR (400 MHz,  $\text{DMSO}-d_6$ )  $\delta$  = 9.90 (s, 1H), 8.03-8.16 (m, 1H), 8.02 (d,  $J$  = 1.6 Hz, 1H), 7.16-7.19 (m, 2H).

$^{13}\text{C}$  NMR (100 MHz,  $\text{DMSO}-d_6$ )  $\delta$  = 154.2, 140.7, 138.5, 124.6, 122.5.

MS (EI, m/z): 95 [ $\text{M}^+$ ].

### 4,6-Dimethylpyrimidin-2-ol

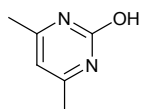

Purification by flash chromatography (petroleum ether/ethyl acetate 4:1). White solid.

$^1\text{H}$  NMR (400 MHz,  $\text{D}_2\text{O}$ )  $\delta$  = 6.65 (s, 1H), 4.71 (s, 1H), 2.45-2.48 (m, 6H).

$^{13}\text{C}$  NMR (100 MHz,  $\text{D}_2\text{O}$ )  $\delta$  = 170.7, 148.9, 106.8, 19.7.

MS (EI, m/z): 124 [ $\text{M}^+$ ].

### 8-Hydroxyquinoline<sup>9</sup>

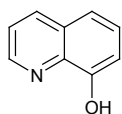

Purification by flash chromatography (petroleum ether/ethyl acetate 4:1). White solid.

$^1\text{H}$  NMR (400 MHz,  $\text{CDCl}_3$ )  $\delta$  = 8.82 (d,  $J$  = 1.2 Hz, 1H), 8.1 (br s, 1H), 8.16-8.81 (m, 1H), 7.45-7.51 (m, 2H), 7.34-7.44 (m, 1H), 7.22-7.24 (m, 1H).

$^{13}\text{C}$  NMR (100 MHz,  $\text{CDCl}_3$ )  $\delta$  = 152.3, 147.9, 138.4, 136.2, 128.6, 127.8, 121.8, 117.9, 110.2.

MS (EI, m/z): 145 [ $\text{M}^+$ ].

### 2,3-Dihydroxy-1,4-naphthoquinone<sup>10</sup>

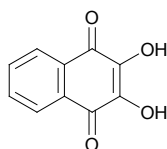

Purification by flash chromatography (petroleum ether/ethyl acetate 4:1). Yellow solid.

$^1\text{H NMR}$  (400 MHz,  $\text{CDCl}_3$ )  $\delta$  = 8.23 (s, 2H), 7.83 (d,  $J$  = 6 Hz, 2H), 7.79 (d,  $J$  = 6 Hz, 2H).

$^{13}\text{C NMR}$  (100 MHz,  $\text{CDCl}_3$ )  $\delta$  = 179.4, 135.5, 133.7, 127.6, 127.0.

MS (EI,  $m/z$ ): 190 [ $\text{M}^+$ ].

#### 4. References

- 1 D. B. Zhao, N. J. Wu, S. Zhang, P. H. Xi, X. Y. Su, J. B. Lan and J. S. You, *Angew. Chem., Int. Ed.*, 2009, **48**, 8729–8732.
- 2 J. Chen, T. Yuan, W. Hao and M. Cai, *Catal. Commun.*, 2011, **12**, 1463–1465.
- 3 L. J. Marshall, K. M. Cable and N. P. Botting, *Tetrahedron*, 2009, **65**, 8165–8170.
- 4 A. Tlili, N. Xia, F. Monnier and M. Taillefer, *Angew. Chem. Int. Ed.*, 2009, **48**, 8725–8728.
- 5 M. Shi, S.-C. Cui and W.-P. Yin, *Eur. J. Org. Chem.*, 2005, 2379–2384.
- 6 H.-J. Xu, Y.-F. Liang, Z.-Y. Cai, H.-X. Qi, C.-Y. Yang and Y.-S. Feng, *J. Org. Chem.*, 2011, **76**, 2296–2300.
- 7 H. Richter, S. Beckendorf and O. G. Mancheño, *Adv. Synth. Catal.*, 2011, **353**, 295–302.
- 8 D. G. De Kowalewski, R. H. Contreras and C. De Los Santos, *J. Mol. Struct.*, 1989, **213**, 201–212.
- 9 A. Takacs, A. Szilagyi, P. Acs, L. Mark, A. F. Peixoto, M. M. Pereira and L. Kollar, *Tetrahedron*, 2011, **67**, 2402–2406.
- 10 P. Khandagale, R. Chikate, S. B. Joshi, B. A. Kulkarni, *J. Alloys Compds.* 2005, **392**, 112–119.

#### 5. $^1\text{H NMR}$ and $^{13}\text{C NMR}$ spectra for the products

##### Phenol

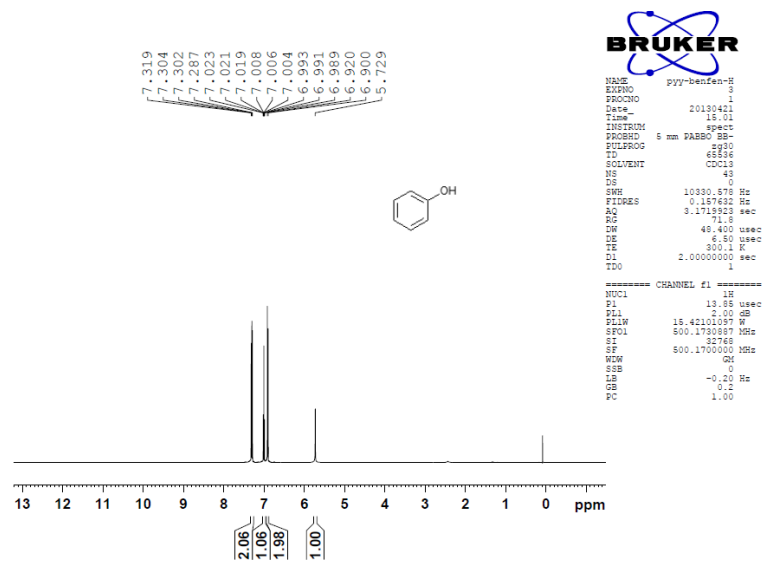



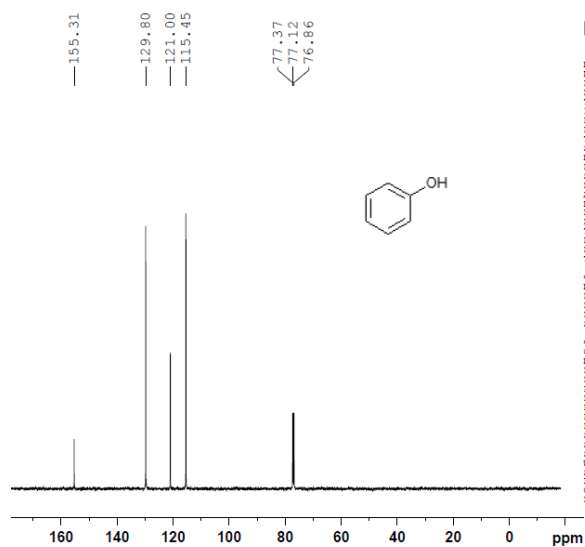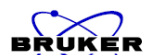

```

NAME    py-benzen-113
EXPNO   3
PROCNO  1
Date_   20130421
Time    15.08
INSTRUM spect
PROBHD  5 mm PABBO BB-
PULPROG zgpg30
TD       65536
SOLVENT CDCl3
NS       2
DS       2
SWH     29761.904 Hz
FIDRES  0.458191 Hz
AQ       1.1010846 sec
RG       3265
DW       16.800 usec
DE       6.80 usec
TE       300.2 K
D1       2.00000000 sec
d11      0.03000000 sec
TDO      1

===== CHANNEL f1 =====
NUC1     13C
P1       9.00 usec
PL1      0.00 dB
PL1W     59.11651611 W
SFO1     125.7604293 MHz

===== CHANNEL f2 =====
CPDPRG2 waltz16
NUC2     1H
PCPD2    80.00 usec
PL2      2.00 dB
PL12     16.77 dB
PL13     16.77 dB
PL1W     18.42101097 W
PL1W     0.51417920 W
PL1W     0.51417920 W
SFO2     500.13605115 MHz
SI       32768
SF       125.7679470 MHz
HWH      GM
SSB      0
LB       4.00 Hz
GB       0
PC       1.40
    
```

*p*-Cresol

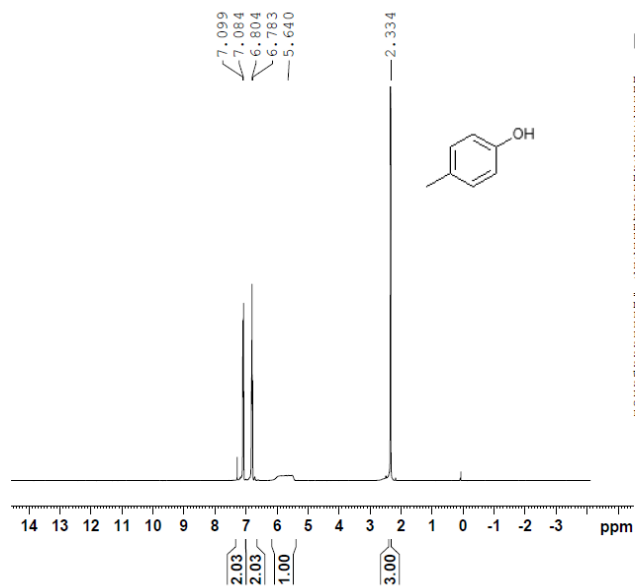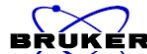

```

NAME    Ki-H1mmr
EXPNO   2
PROCNO  1
Date_   20130509
Time    17.24
INSTRUM spect
PROBHD  5 mm PABBO BB-
PULPROG zgpg30
TD       65536
SOLVENT CDCl3
NS       11
DS       2
SWH     8223.685 Hz
FIDRES  0.128482 Hz
AQ       2.9986897 sec
RG       40.9
DW       60.800 usec
DE       6.80 usec
TE       295.2 K
D1       1.00000000 sec
TDO      1

===== CHANNEL f1 =====
NUC1     1H
P1       14.00 usec
PL1      0.00 dB
PL1W     11.32860786 W
SFO1     400.1324710 MHz
SI       32768
SF       400.1300000 MHz
HWH      GM
SSB      0
LB       -0.20 Hz
GB       0.2
PC       1.00
    
```

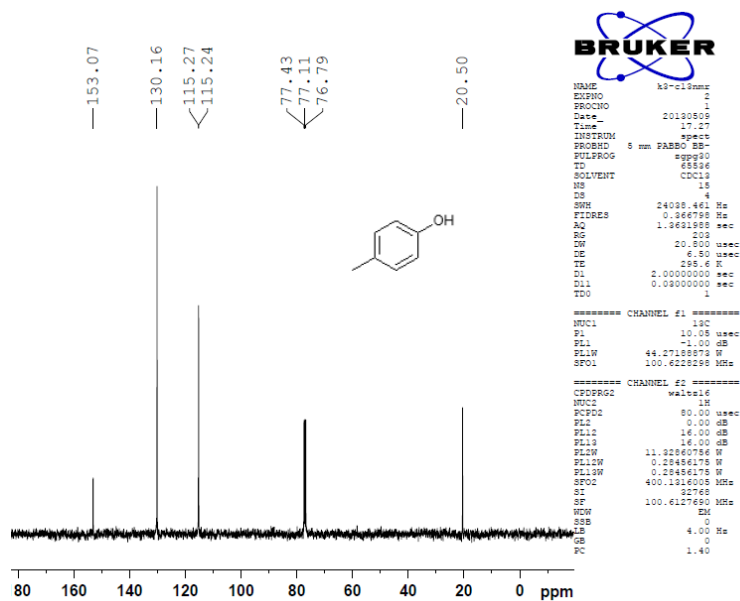

**4-Methoxyphenol**

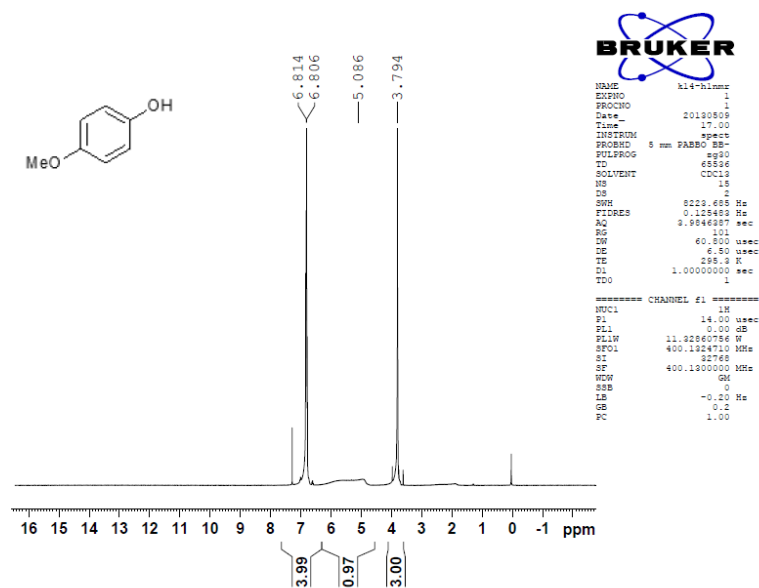

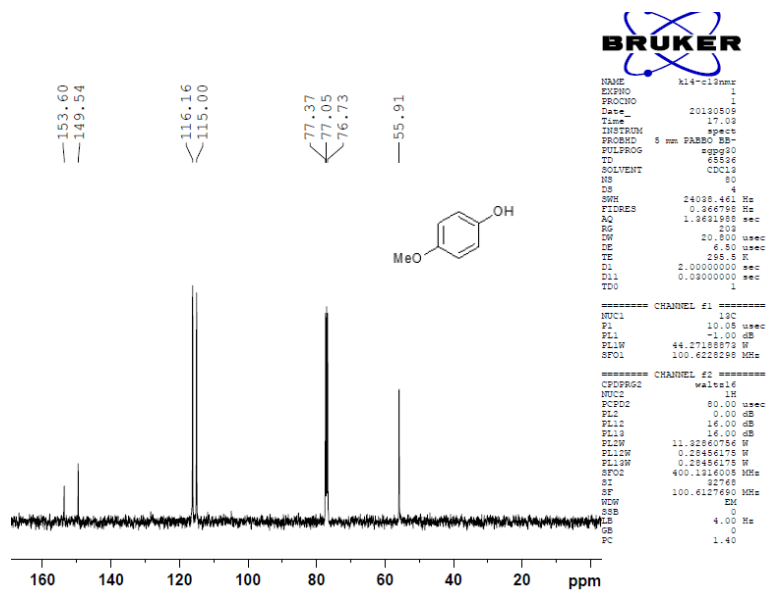

### 4-Nitrophenol

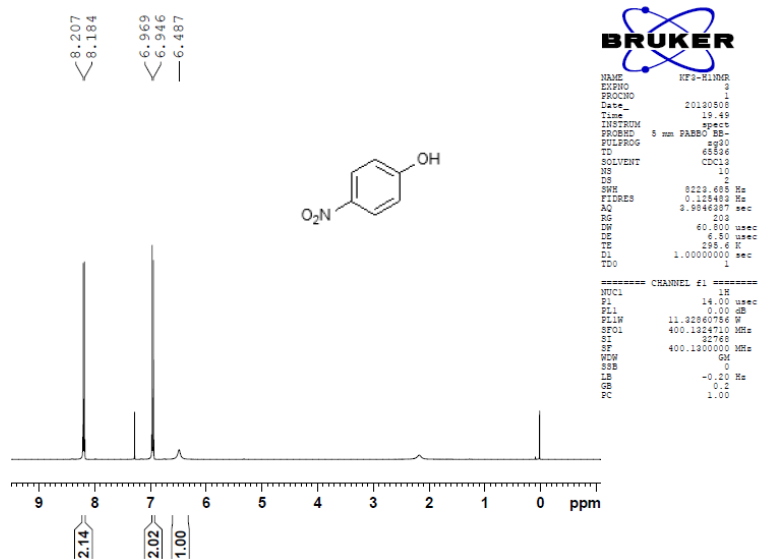

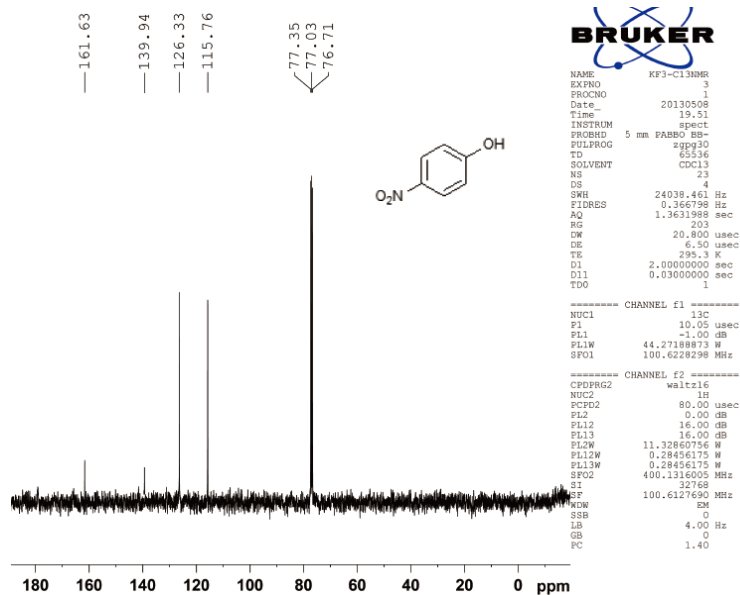

**Hydroquinone**

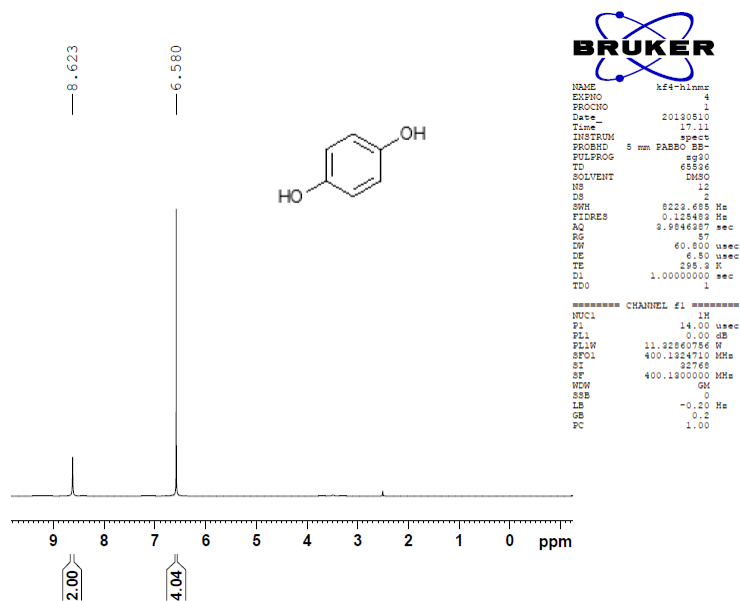

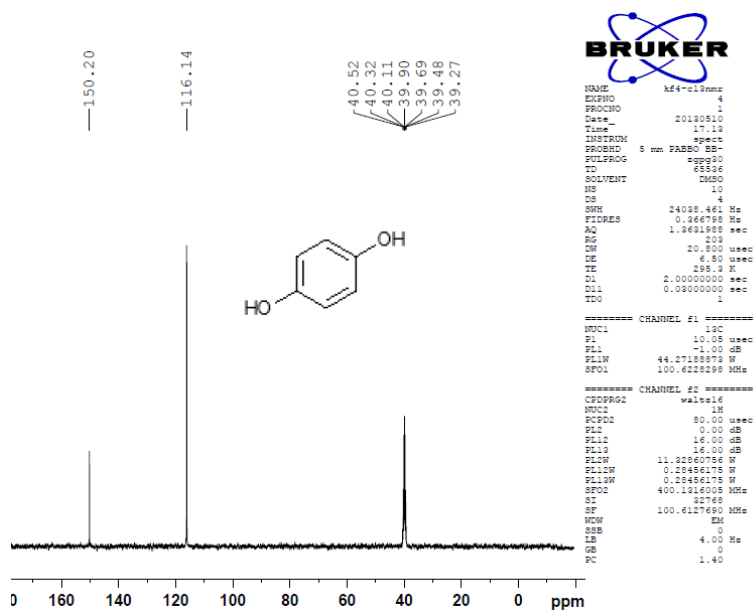

**4-Hydroxyacetophenone**

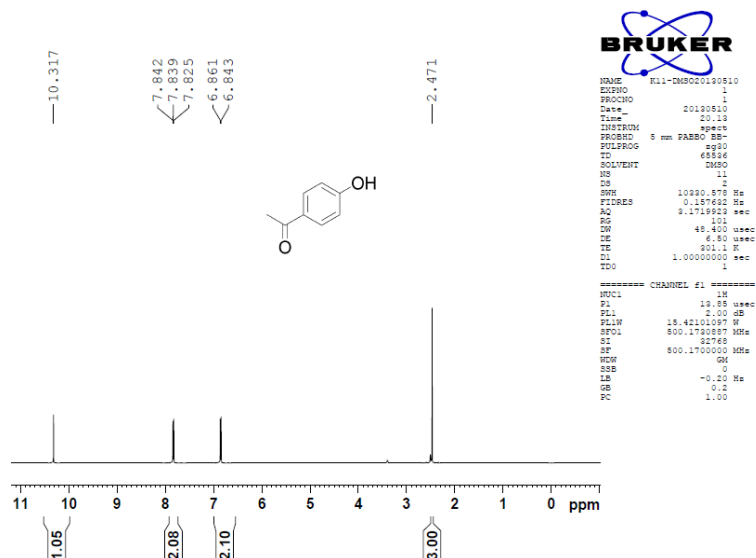

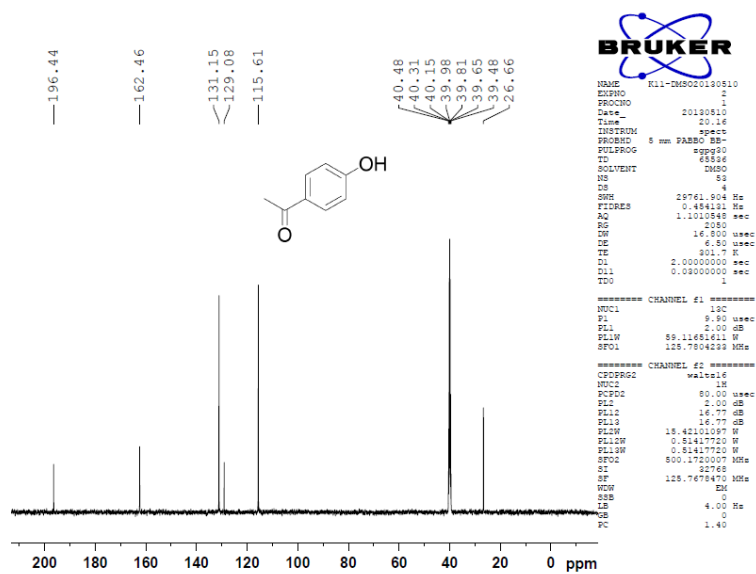

**4-Hydroxybenzoic acid**

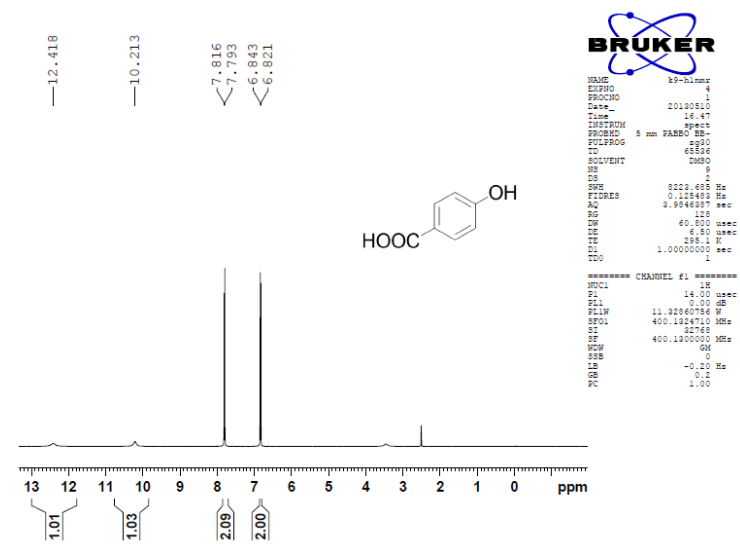

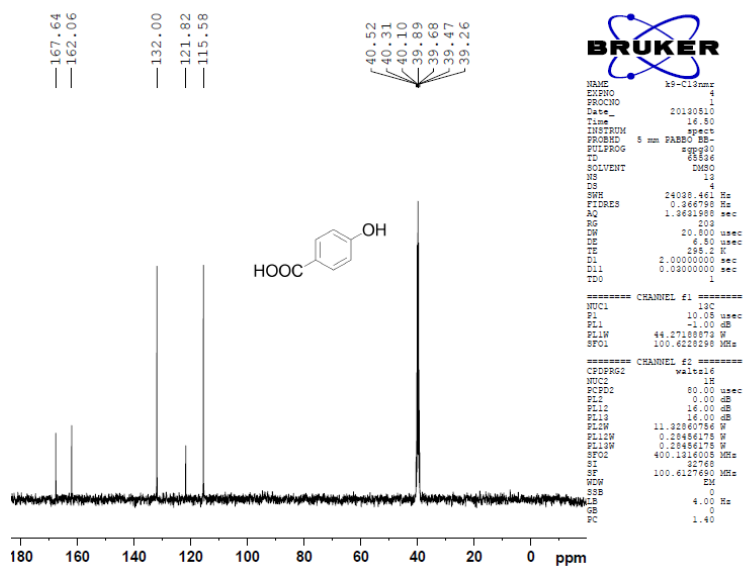

4-Hydroxybenzaldehyde

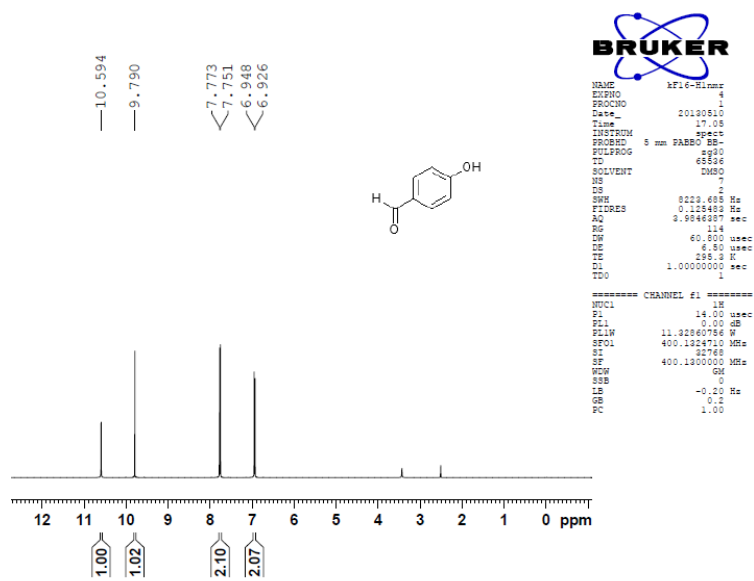

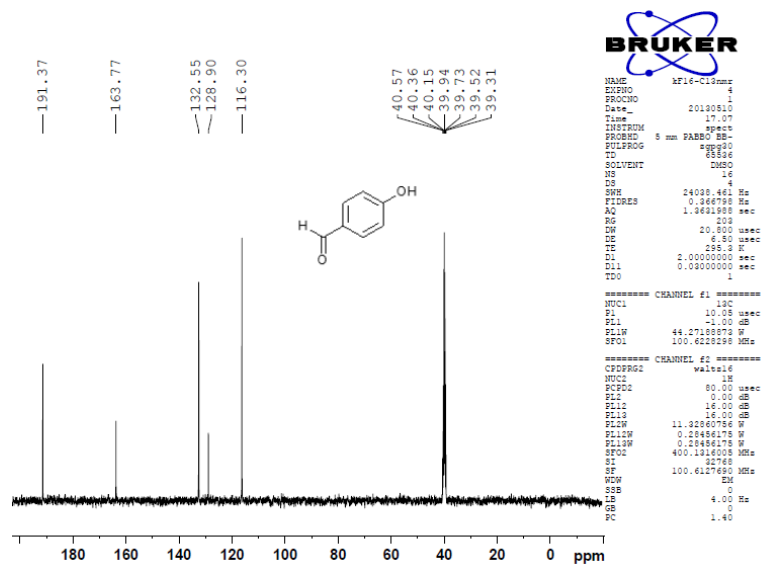

4-Hydroxybenzonitrile

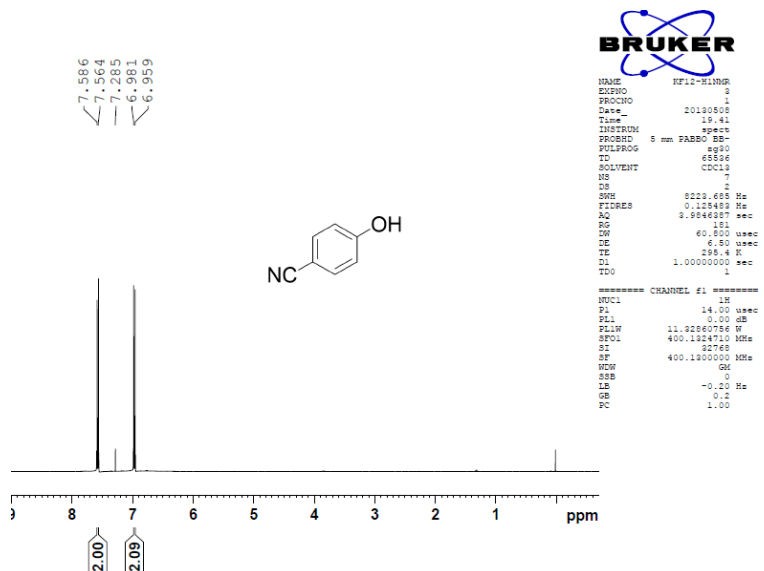



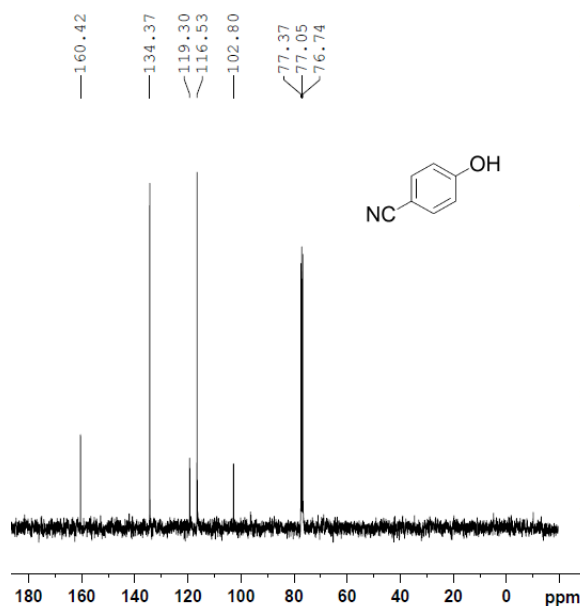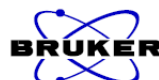

```

NAME      NP12-C13NMR
EXPNO    3
PROCNO   1
Date_    20130508
Time     19.43
INSTRUM  spect
PROBHD   5 mm PABBO BB-
PULPROG  zgpg30
TD        65536
SOLVENT  CDCl3
NS        18
DS        4
SWH      24098.461 Hz
FIDRES   0.366769 Hz
AQ        1.9621988 sec
RG        200
SM        20.800 usec
DE        6.50 usec
TE        295.4 K
D1        2.0000000 sec
D11       0.0300000 sec
TDO       1

===== CHANNEL f1 =====
NUC1     13C
P1        10.08 usec
PL1       -1.00 dB
PL1W     44.2718873 W
SFO1     100.6232298 MHz

===== CHANNEL f2 =====
CPDPRG2  waltz16
NUC2     1H
PCPD2    80.00 usec
PL2       0.00 dB
PL12     16.00 dB
PL13     16.00 dB
PL1W     11.82860756 W
PL1W     0.28456178 W
PL1W     0.28456178 W
SFO2     400.1316008 MHz
SI        32768
SF        100.6127690 MHz
WDW       EM
SSB       0
LB        4.00 Hz
GB        0
PC        1.40
    
```

#### 4-Fluorophenol

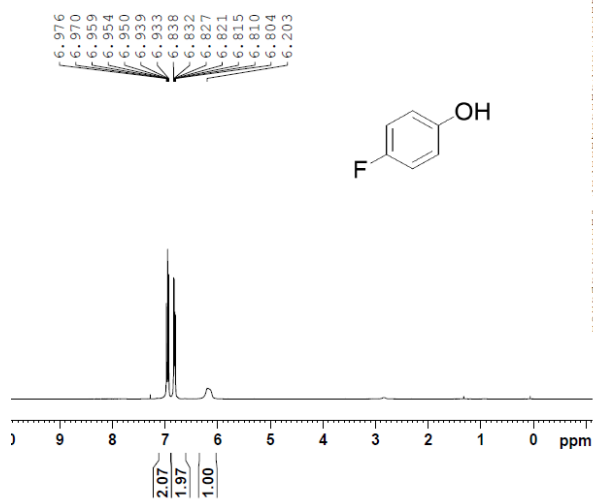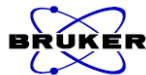

```

NAME      4F-1H100
EXPNO    3
PROCNO   1
Date_    20130810
Time     16.30
INSTRUM  spect
PROBHD   5 mm PABBO BB-
PULPROG  zgpg30
TD        65536
SOLVENT  CDCl3
NS        2
DS        2
SWH      8223.688 Hz
FIDRES   0.128489 Hz
AQ        3.9846887 sec
RG        96
SM        60.800 usec
DE        6.50 usec
TE        294.9 K
D1        1.0000000 sec
TDO       1

===== CHANNEL f1 =====
NUC1     1H
P1        14.00 usec
PL1       0.00 dB
PL1W     11.82860756 W
SFO1     400.1324710 MHz
SI        32768
SF        400.1300000 MHz
WDW       EM
SSB       0
LB        0.10 Hz
GB        0
PC        1.00
    
```

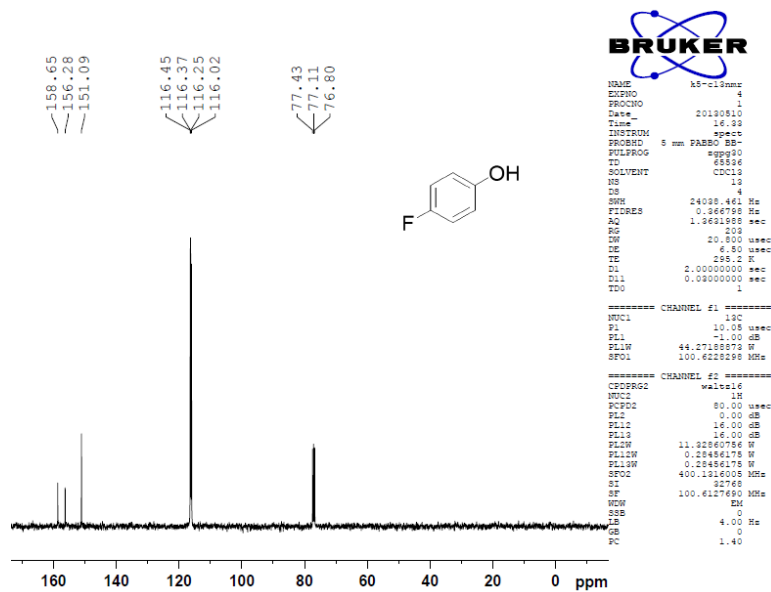

**4-Chlorophenol**

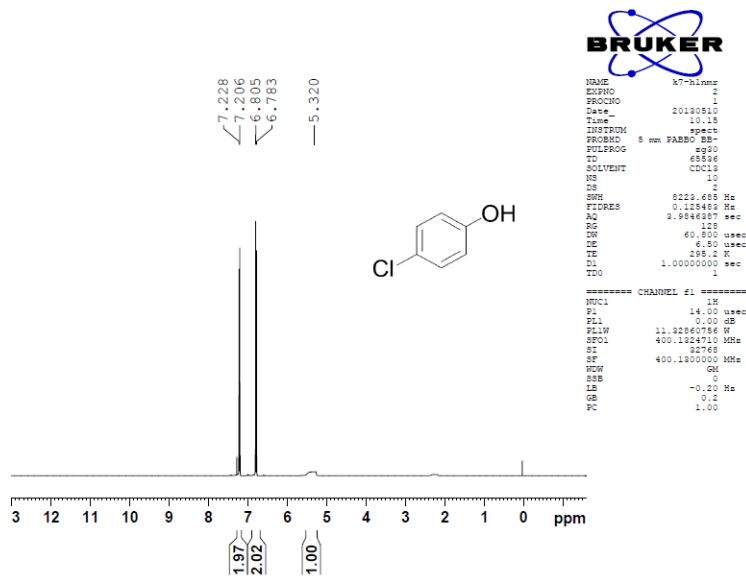

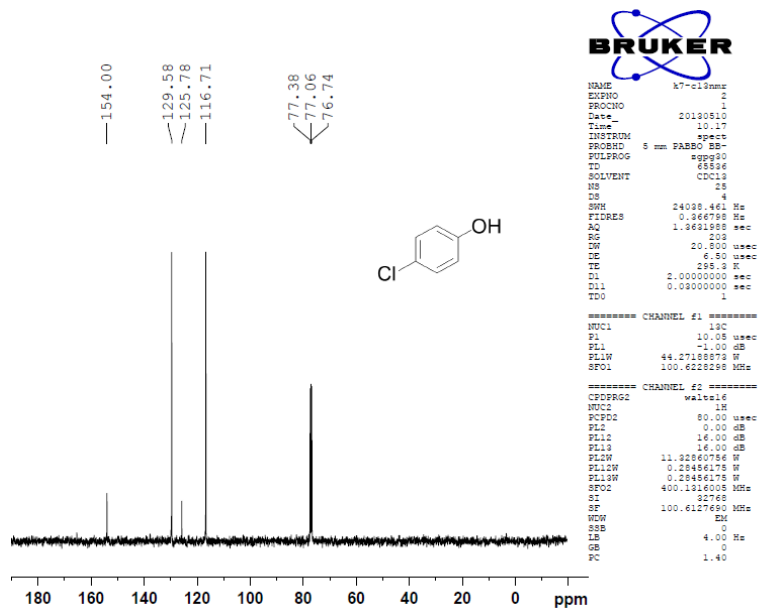

#### 4-Bromophenol

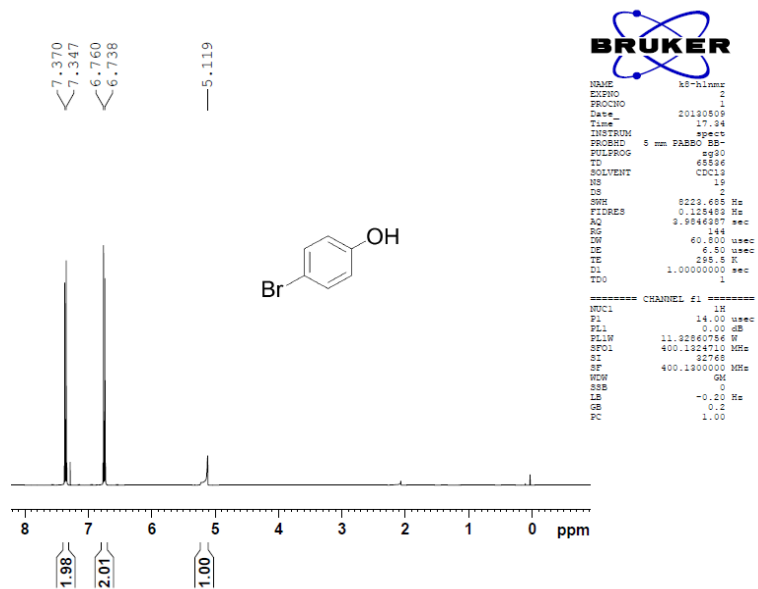

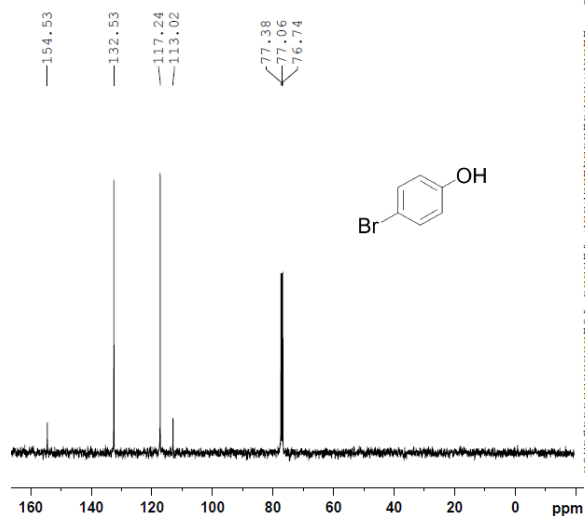

**BRUKER**

```

NAME      h2-h1nmr
EXPNO     4
PROCNO    1
Date_     20130501
Time      17.47
INSTRUM   spect
PROBHD    5 mm PABBO BB-
PULPROG   zgpg30
TD         65536
SOLVENT   CDCl3
NS         25
DS         4
SFR       24000.000 Hz
FIDRES    0.066798 Hz
AQ         1.5691980 sec
RG         320
DM         20.800 usec
DE         4.80 usec
TE         298.2 K
D1         2.00000000 sec
D11        0.05000000 sec
TDO        1

===== CHANNEL f1 =====
NUC1       13C
P1         10.00 usec
PL1        -1.00 dB
PLN        44.2718370 Hz
SFO1       100.6228298 MHz

===== CHANNEL f2 =====
CPDPRG2   waltz16
NUC2       1H
PCPD      80.00 usec
PL2        0.00 dB
PL12       14.00 dB
PL13       14.00 dB
PLN        11.22660786 Hz
PL1W       0.22486178 Hz
PL1SW      0.22486178 Hz
SFO2       400.1824710 MHz
SF         400.1824710 MHz
WDR        22768
SF         100.6127690 MHz
MCH        GM
SSB        0
LB         4.00 Hz
GB         0.00
PC         1.40
    
```

***o*-Cresol**

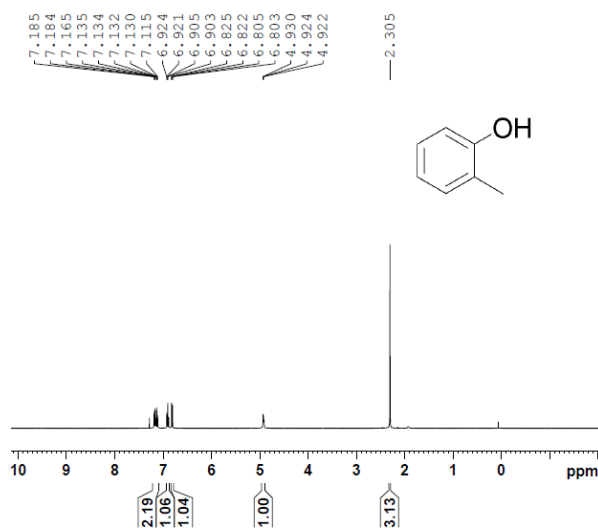

**BRUKER**

```

NAME      h2-h1nmr
EXPNO     4
PROCNO    1
Date_     20130510
Time      14.18
INSTRUM   spect
PROBHD    5 mm PABBO BB-
PULPROG   zgpg30
TD         65536
SOLVENT   CDCl3
NS         11
DS         2
SFR       8223.666 Hz
FIDRES    0.128463 Hz
AQ         2.584628 sec
RG         320.5
DM         60.800 usec
DE         6.80 usec
TE         298.2 K
D1         1.00000000 sec
TDO        1

===== CHANNEL f1 =====
NUC1       1H
P1         14.00 usec
PL1        0.00 dB
PLN        11.22660786 Hz
SFO1       400.1824710 MHz
SF         400.1824710 MHz
WDR        22768
SF         400.1824710 MHz
MCH        GM
SSB        0
LB         -0.20 Hz
GB         0.00
PC         1.00
    
```

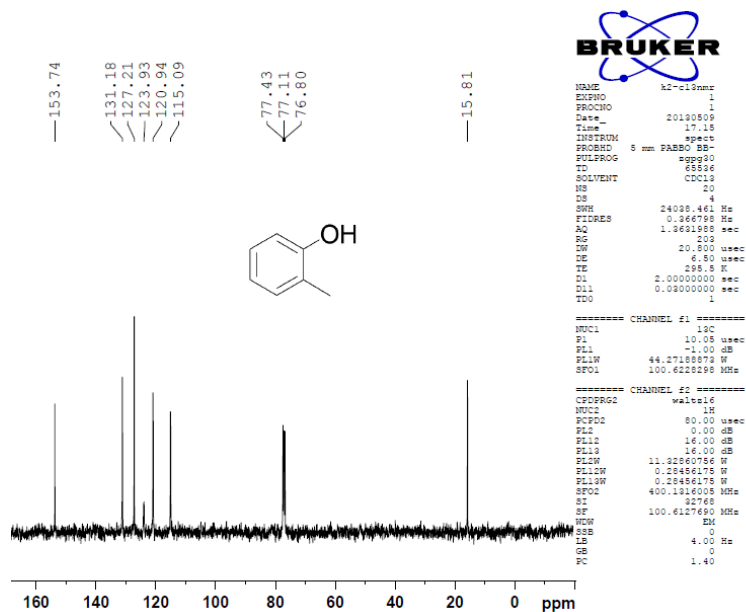

***o*-Nitrophenol**

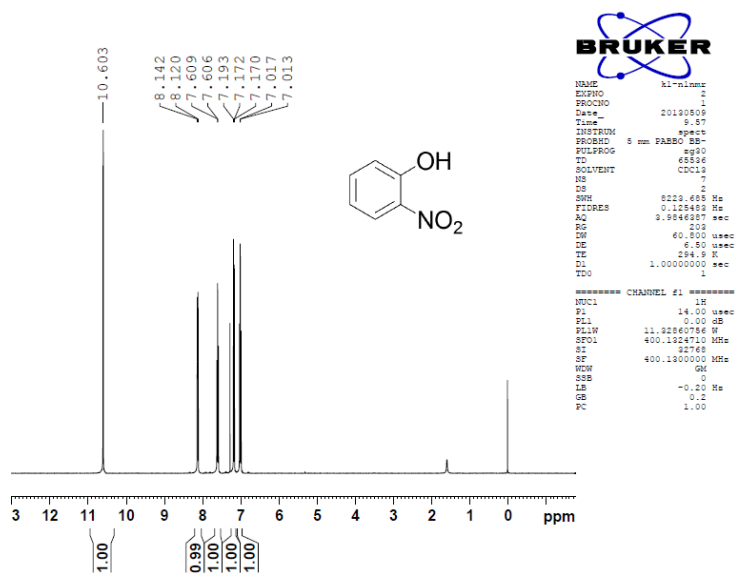

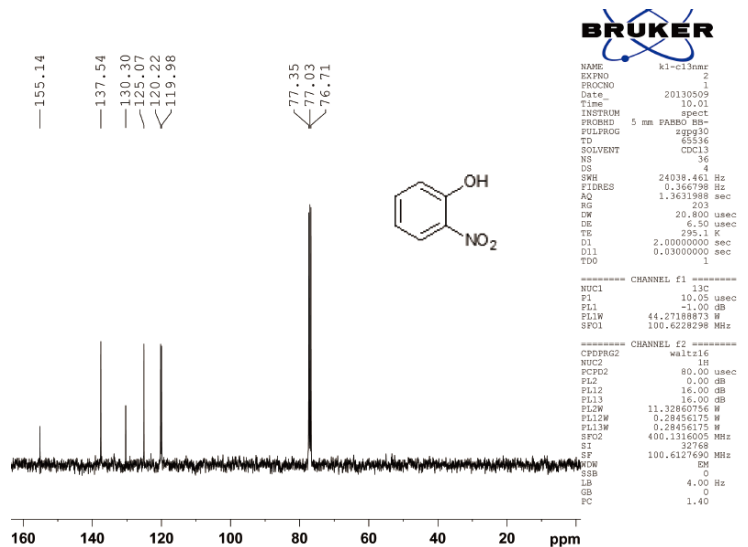

Catechol

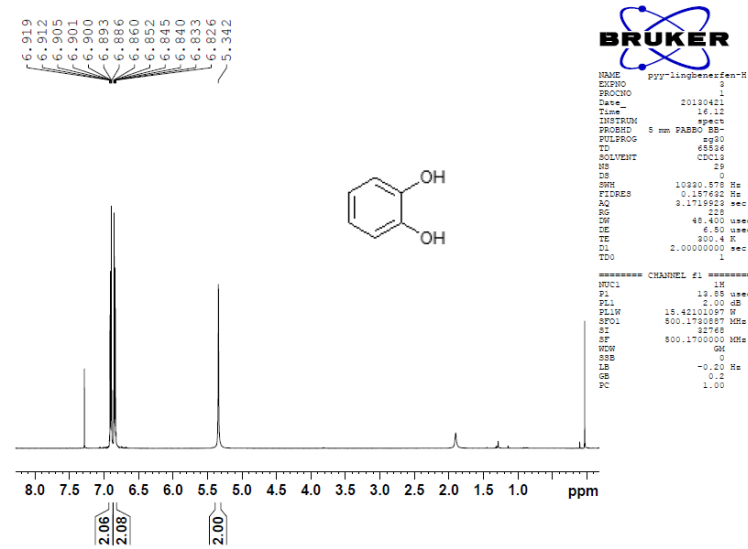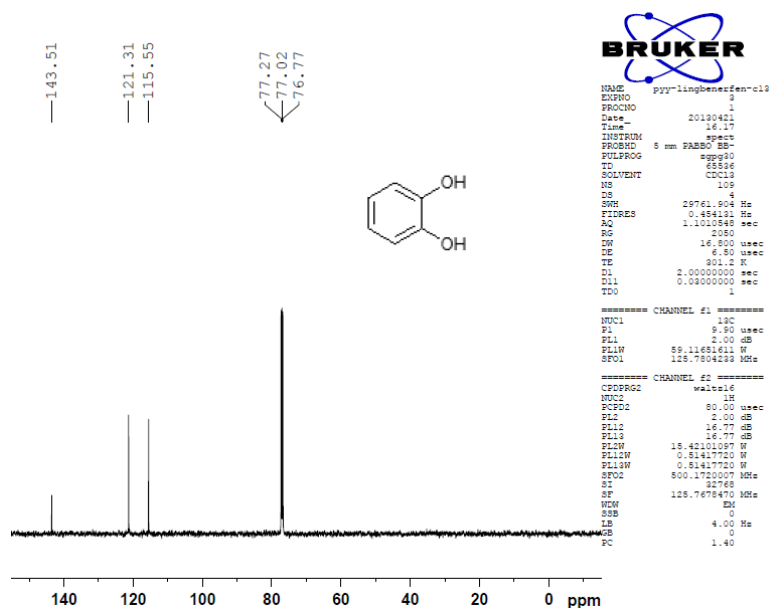

### 2-Hydroxybenzoic acid

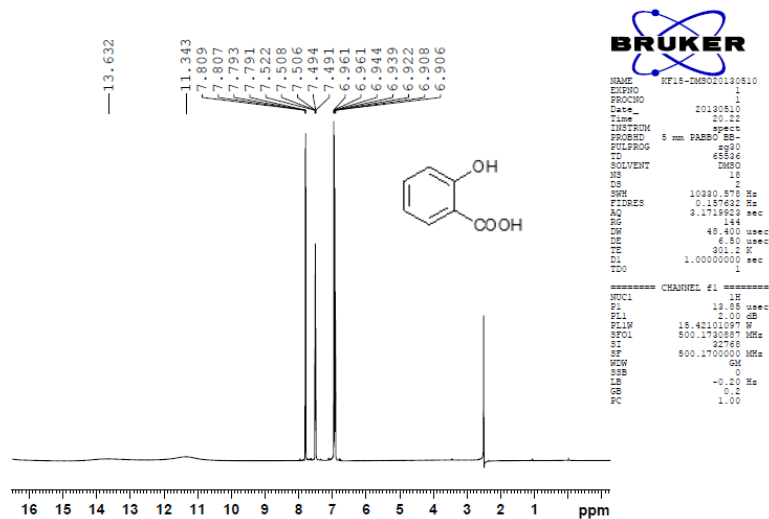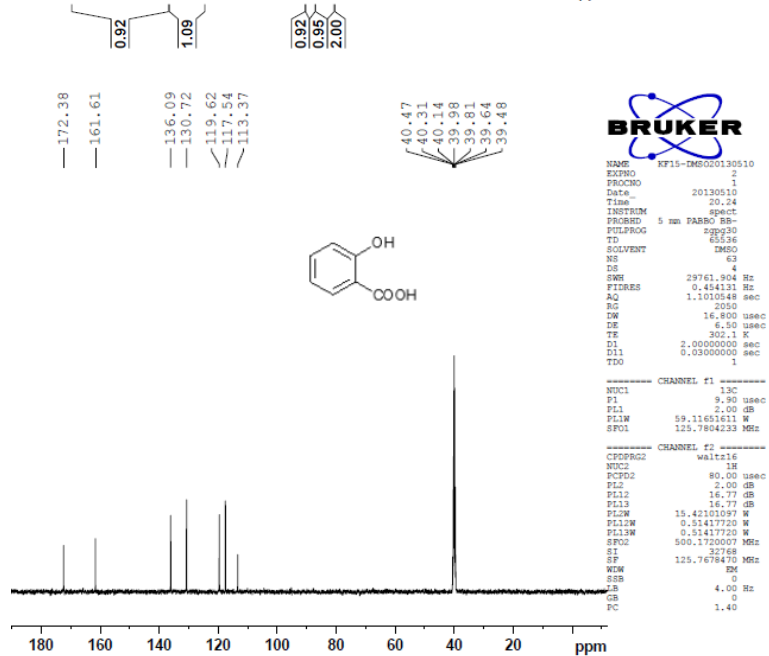

### 2-Chlorophenol

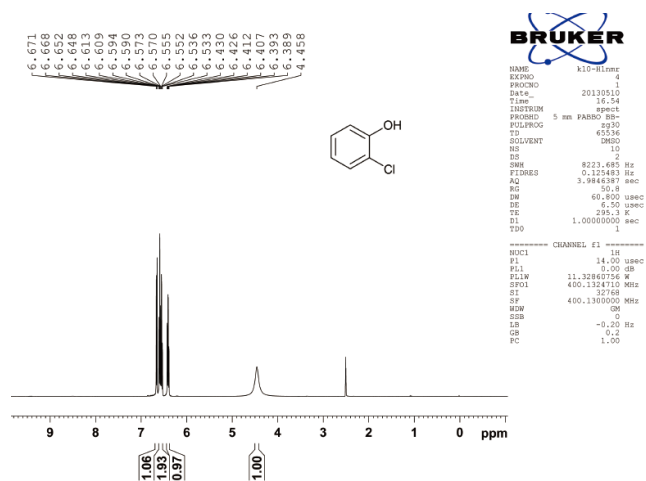

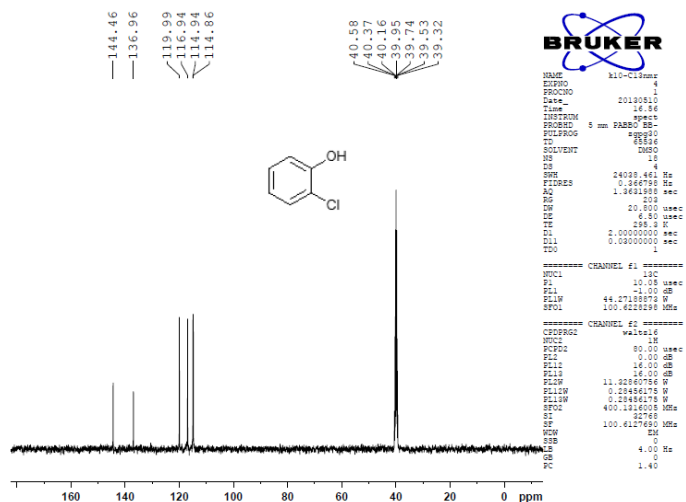

*m*-Methylphenol

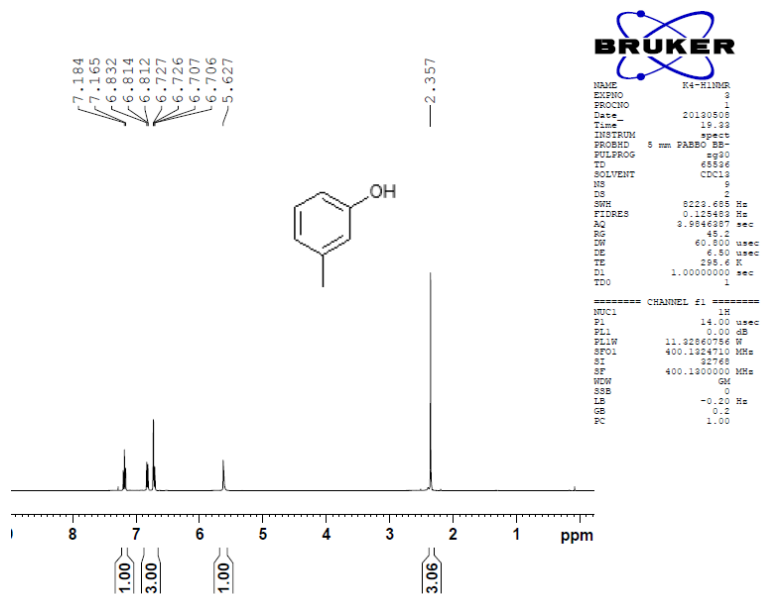



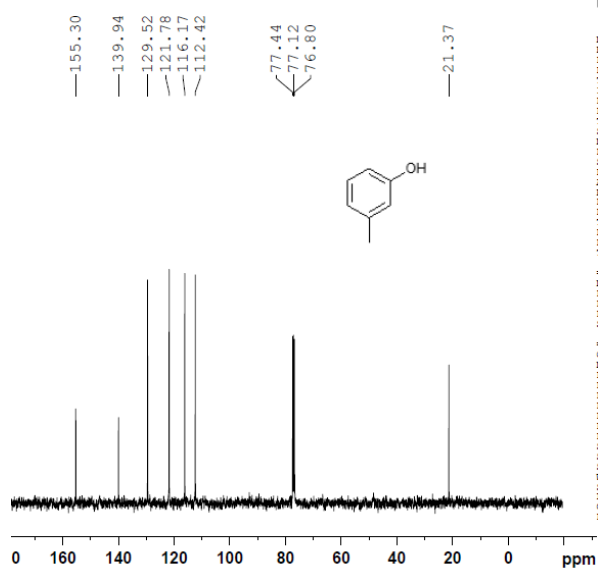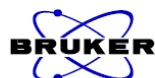

```

NAME      H4-C13MR
EXPNO     3
PROCNO    1
Date_     20130505
Time      19.35
INSTRUM   spect
PROBHD    5 mm PABBO BB-
PULPROG   zgpg30
TD         65536
SOLVENT   CDCl3
NS         14
DS         4
SWH        24032.461 Hz
FIDRES     0.366795 Hz
AQ         1.363185 sec
RG          202
SW         20.000 usec
DE         6.50 usec
TE         298.2 K
D1         2.0000000 sec
D11        0.0300000 sec
TD0        1

===== CHANNEL f1 =====
NUC1       13C
P1         10.00 usec
PL1        -1.00 dB
PL1S       44.2718873 W
SFO1       100.6282298 MHz

===== CHANNEL f2 =====
CPDPRG2   waltz16
NUC2       1H
PCPD2     80.00 usec
PL2        0.00 dB
PL12       16.00 dB
PL13       16.00 dB
PL14       11.92860756 W
PL15       0.28486175 W
PL16       0.28486175 W
SFO2       400.1424005 MHz
SI         32768
SF         100.6127680 MHz
WDW        EM
SSB        0
LB         4.00 Hz
GB         0
PC         1.40
    
```

*m*-Methoxyphenol

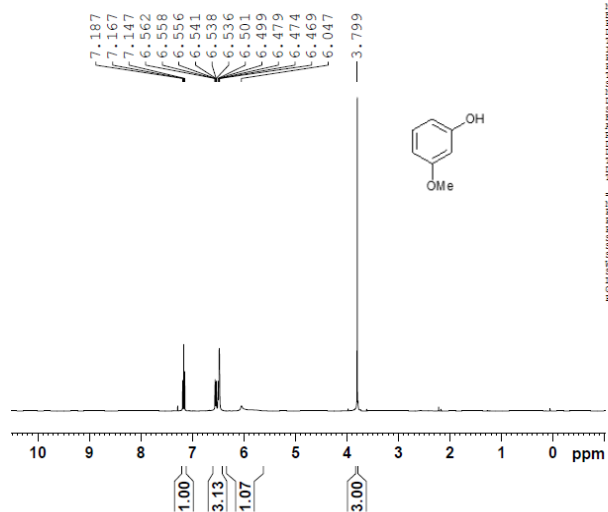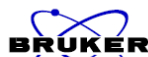

```

NAME      m-MIAVANG-72200FEN-H13MR
EXPNO     2
PROCNO    1
Date_     20130505
Time      19.17
INSTRUM   spect
PROBHD    5 mm PABBO BB-
PULPROG   zgpg30
TD         65536
SOLVENT   CDCl3
NS         9
DS         4
SWH        8223.688 Hz
FIDRES     0.123883 Hz
AQ         0.9846807 sec
RG          45.0
SW         60.000 usec
DE         6.50 usec
TE         298.2 K
D1         1.0000000 sec
TD0        1

===== CHANNEL f1 =====
NUC1       1H
P1         14.00 usec
PL1        0.00 dB
PL1S       11.92860756 W
SFO1       400.1424005 MHz
SI         32768
SF         400.1420000 MHz
WDW        EM
SSB        0
LB         -0.10 Hz
GB         0.2
PC         1.00
    
```

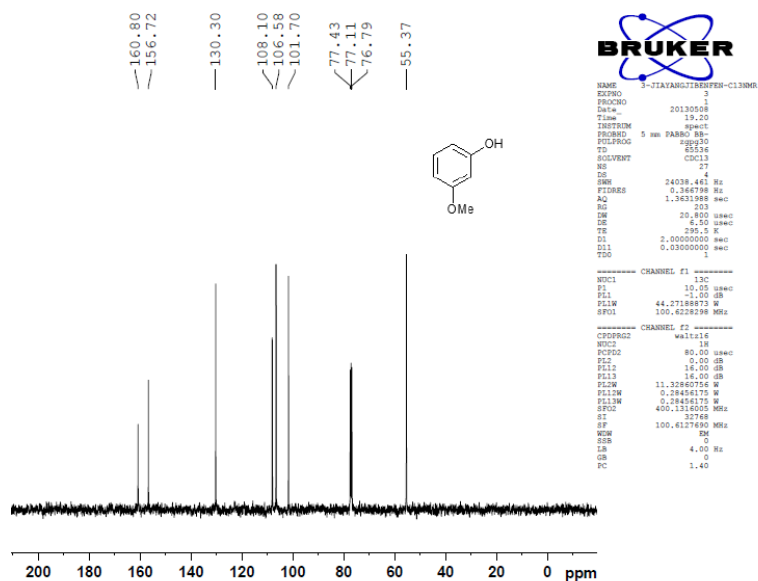

### 3,4-Dimethylphenol

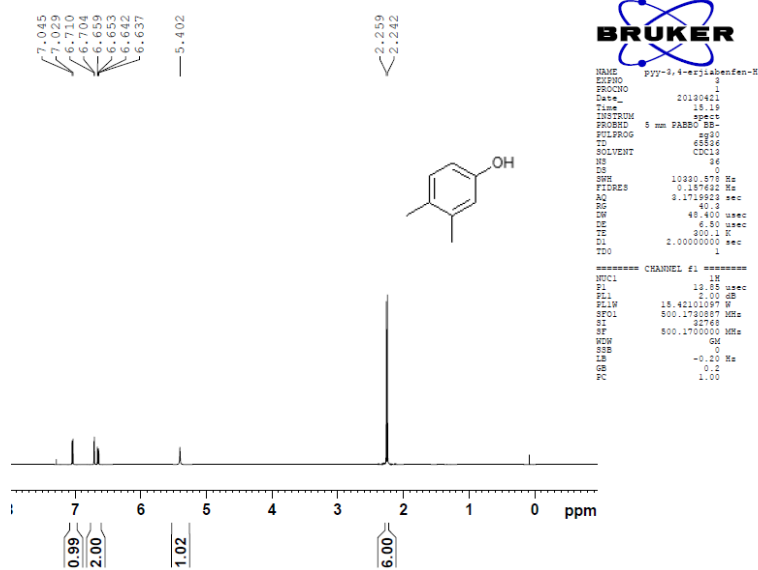

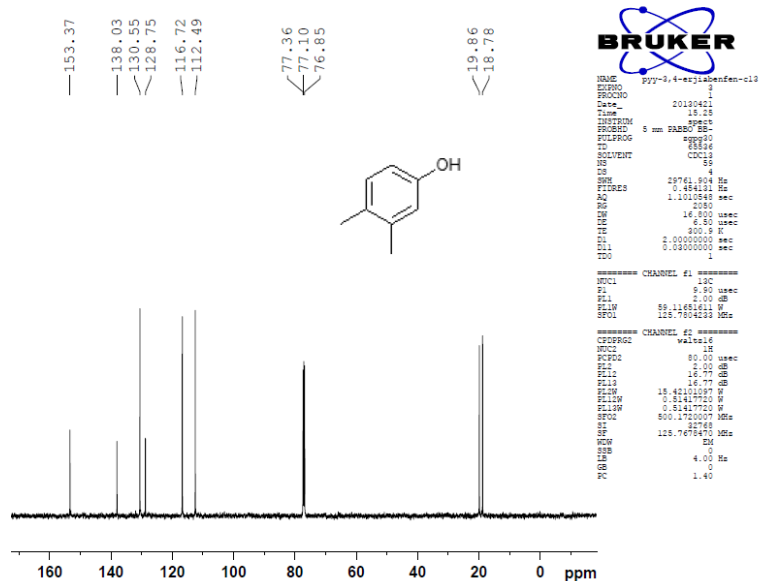

**3, 5-Dihydroxytoluene**

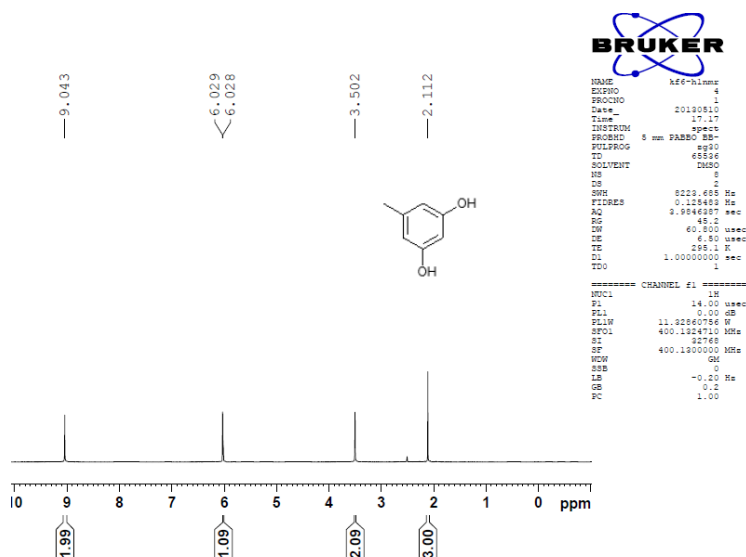

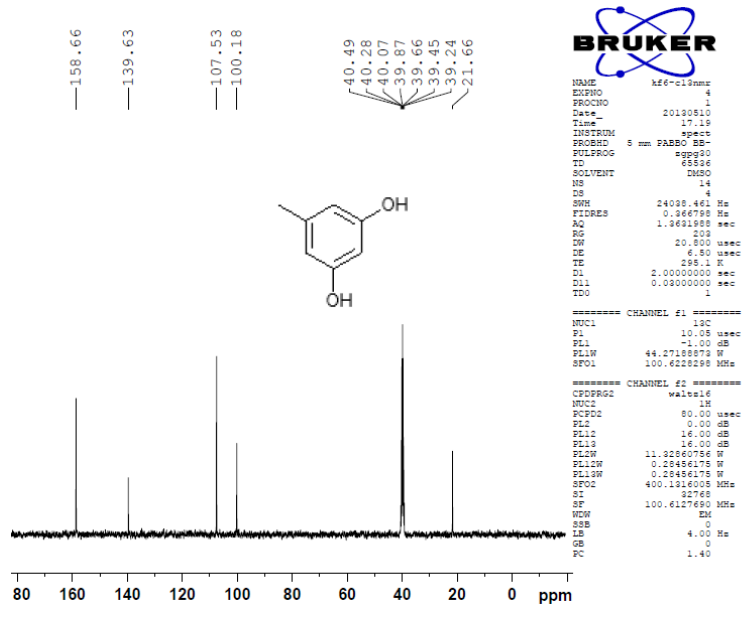

**3-Hydroxypyridine**

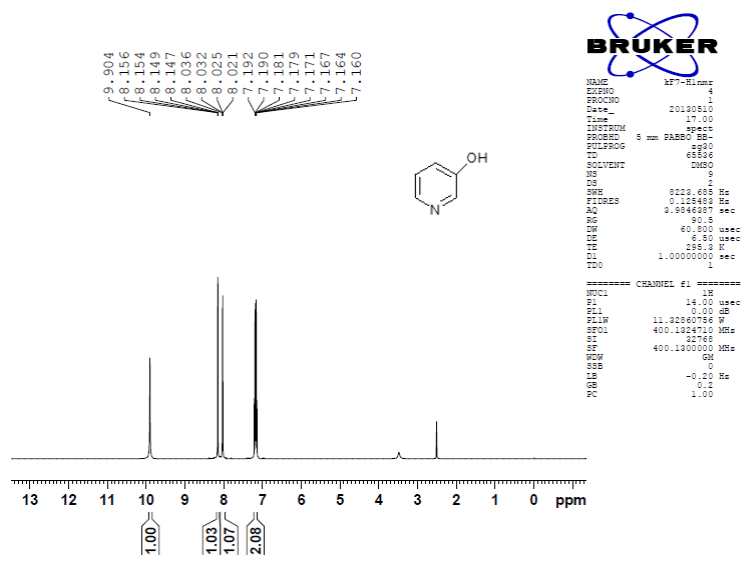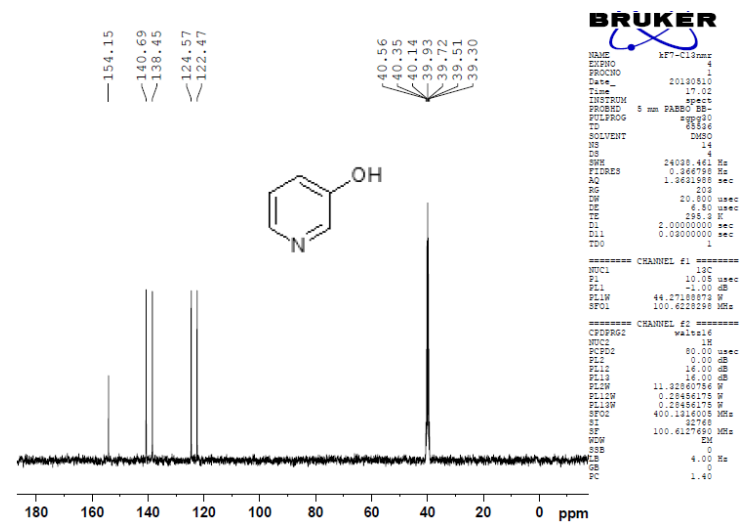

### 4,6-Dimethylpyrimidin-2-ol

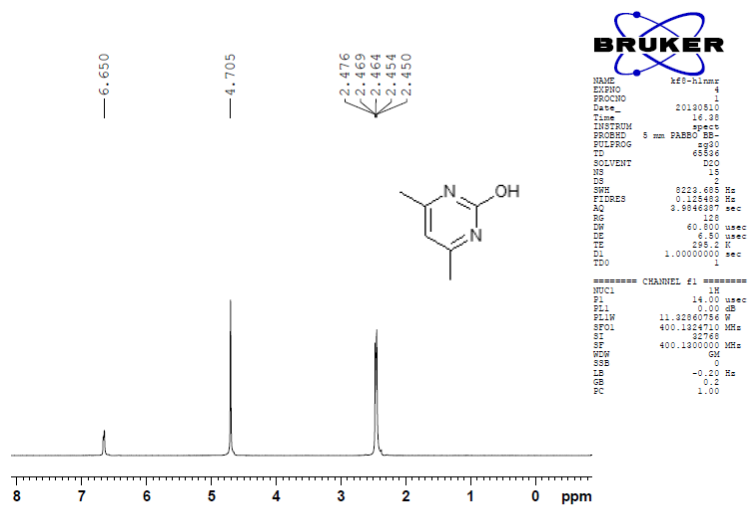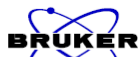

```

NAME      kfs-himnr
EXPNO    4
PROCNO   1
Date_    20130510
Time     16.28
INSTRUM  spect
PROBHD   5 mm F400
PULPROG  zgpg30
PC       62696
SOLVENT  D2O
NS       2
DS       4
SWH      5022.485 Hz
FIDRES   0.128488 Hz
AQ       3.9546287 sec
RG       128
DM       60.800 usec
DE       6.80 usec
TE       298.2 K
DQ       1.0000000 sec
TD       1
===== CHANNEL f1 =====
NUC1     13C
P1       14.00 usec
PL1     0.00 dB
PL12    11.82860786 W
SFO1     400.125410 MHz
SI       32768
SF       400.1250000 MHz
WDW      EM
SSB      0
LB       -0.20 Hz
GB       0
PC       1.00
    
```

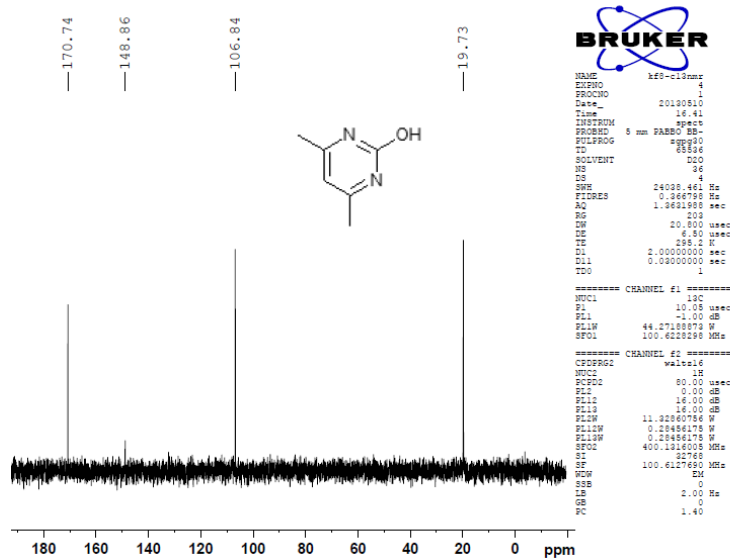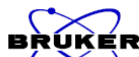

```

NAME      kfs-cl19mr
EXPNO    4
PROCNO   1
Date_    20130510
Time     16.41
INSTRUM  spect
PROBHD   5 mm F400
PULPROG  zgpg30
PC       62696
SOLVENT  D2O
NS       2
DS       4
SWH      24038.461 Hz
FIDRES   0.366798 Hz
AQ       1.3624988 sec
RG       208
DM       20.800 usec
DE       6.80 usec
TE       298.2 K
DQ       2.0000000 sec
TD       0.03000000 sec
===== CHANNEL f1 =====
NUC1     13C
P1       10.08 usec
PL1     -1.00 dB
PL12    44.27188873 W
SFO1     100.628358 MHz
===== CHANNEL f2 =====
CPDPRG2  waltz16
NUC2     13C
P2       80.00 usec
PL2     0.00 dB
PL12    16.00 dB
PL13    16.00 dB
PL14    16.00 dB
PL15    16.00 dB
PL16    16.00 dB
PL17    16.00 dB
PL18    16.00 dB
PL19    16.00 dB
PL20    16.00 dB
SFO2     100.627950 MHz
SI       32768
SF       100.6279500 MHz
WDW      EM
SSB      0
LB       2.00 Hz
GB       0
PC       1.40
    
```

### 8-Hydroxyquinoline

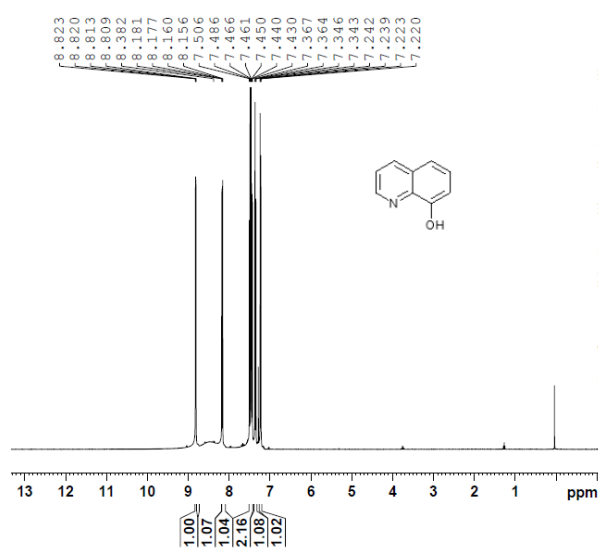

**BRUKER**

```

NAME      kf11-cl3nmr
EXPNO     2
PROCNO    1
Date_     20130810
Time      9.56
INSTRUM   spect
PROBHD    5 mm PABBO BB-
PULPROG   zgpg30
TD         65536
SOLVENT   CDCl3
NS         2
DS         2
SWH        8223.665 Hz
FIDRES     0.125489 Hz
AQ         2.9246207 sec
RG         114
AQ         60.800 usec
DE         6.80 usec
TE         300.2 K
DL         1.00000000 sec
DQ         1
===== CHANNEL f1 =====
NUC1       13C
P1         14.00 usec
PL1        0.00 dB
PL12       11.22460756 W
SFO1       400.1224710 MHz
SI         32768
SF         400.1220000 MHz
WDW        EM
SSB        0
LB         -0.20 Hz
GB         0
PC         1.00
    
```

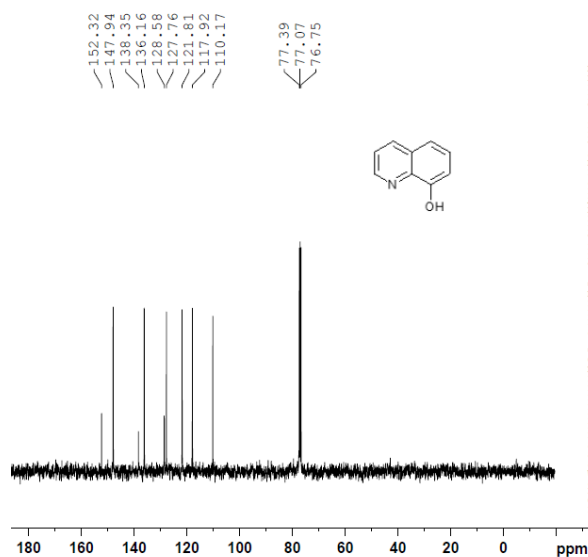

**BRUKER**

```

NAME      kf11-cl3nmr
EXPNO     2
PROCNO    1
Date_     20130810
Time      9.58
INSTRUM   spect
PROBHD    5 mm PABBO BB-
PULPROG   zgpg30
TD         65536
SOLVENT   CDCl3
NS         2
DS         4
SWH        24039.461 Hz
FIDRES     0.262756 Hz
AQ         1.2651959 sec
RG         208
AQ         20.800 usec
DE         6.80 usec
TE         300.2 K
DL         2.00000000 sec
DQ         0.08000000 sec
DQ         1
===== CHANNEL f1 =====
NUC1       13C
P1         10.00 usec
PL1        -1.00 dB
PL12       44.27128875 W
SFO1       100.6263898 MHz
===== CHANNEL f2 =====
CPDPRG2   waltz16
NUC2       1H
P2         80.00 usec
PL2        0.00 dB
PL12       14.00 dB
PL13       14.00 dB
PL14       11.22460756 W
PL15       0.28456175 W
SFO2       400.1224710 MHz
SI         32768
SF         100.6127660 MHz
WDW        EM
SSB        0
LB         4.00 Hz
GB         0
PC         1.40
    
```

2,3-Dihydroxy-1,4-naphthoquinone

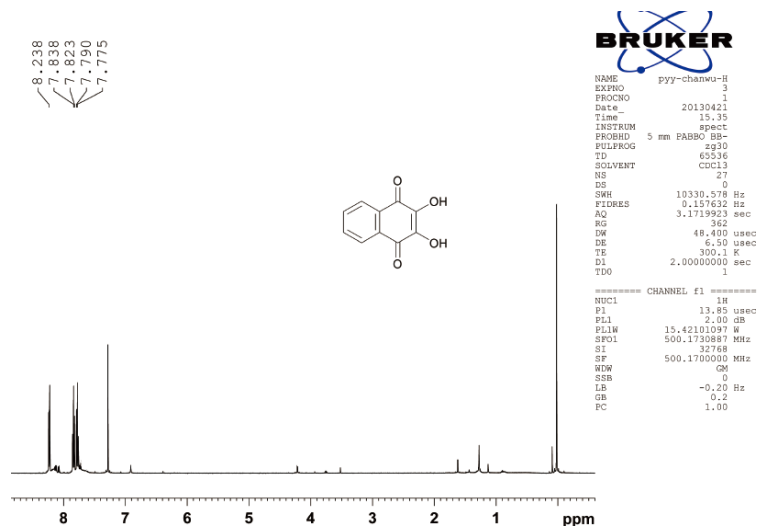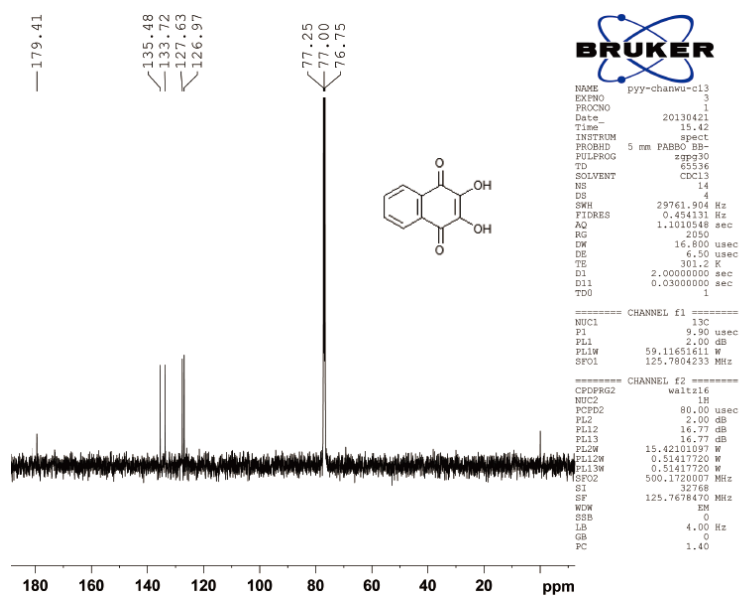

Supplement: c3ra44613a.pdf [file c3ra44613a.pdf]
